# Supplementary material for: Pharmacokinetics, Pharmacodynamics, and Modulation of Hepatic Glucose Production With Insulin Glargine U300 and Glargine U100 at Steady State With Individualized Clinical Doses in Type 1 Diabetes
Source: Oxford University Press journal article supplement (doi:10.2337/dc18-0706), 2018-10-10

# SUPPLEMENTARY DATA

Supplementary Table 1. Outcome measures at baseline and following three months of treatment.

|                                             |                          | <b><u>After three months of treatment</u></b> |                |                          |
|---------------------------------------------|--------------------------|-----------------------------------------------|----------------|--------------------------|
|                                             | <b>Baseline</b>          | <b>Gla-300</b>                                | <b>Gla-100</b> | <b>Between-treatment</b> |
|                                             |                          | (n=18)                                        | (n=18)         | p value                  |
| M/F (%)                                     | 10/8 (55%/45%)           |                                               |                |                          |
| Age (years)                                 | 39.7 ± 11.8              |                                               |                |                          |
| Diabetes duration (years)                   | 25.9 ± 12.2              |                                               |                |                          |
| Plasma C-peptide (ng/ml)                    | 0.01 ± 0.01              |                                               |                |                          |
| Weight (kg)                                 | 68.8 ± 9.6               | 68.3 ± 9.8                                    | 68.5 ± 9.7     | 0.914                    |
| BMI (kg/m <sup>2</sup> )                    | 23.4 ± 2.2               | 23.2 ± 2.3                                    | 23.3 ± 2.2     | 0.877                    |
| Total daily insulin dose (U/kg)             | 0.58 ± 0.16              | 0.62 ± 0.13                                   | 0.56 ± 0.13    | 0.001                    |
| Basal daily insulin dose (U/kg)             | 0.30 ± 0.07              | 0.35 ± 0.08                                   | 0.28 ± 0.07    | 0.001                    |
| Basal insulin dose (% of total insulin)     | 51.2 ± 5.8               | 56.6 ± 8.4                                    | 50.3 ± 6.8     | 0.001                    |
| Prandial daily insulin dose (U/kg)          | 0.29 ± 0.10              | 0.27 ± 0.08                                   | 0.28 ± 0.08    | 0.161                    |
| Prandial insulin dose (% of total insulin)  | 48.8 ± 5.5               | 43.4 ± 8.4                                    | 49.7 ± 6.8     | 0.001                    |
| Daily mean blood glucose (mg/dl)            | 158 ± 22                 | 149 ± 17                                      | 152 ± 19       | 0.108                    |
| HbA1c (%)                                   | 7.19 ± 0.52              | 6.94 ± 0.48                                   | 6.97 ± 0.49    | 0.774                    |
| HbA1c, mmol/mol (IFCC)                      | 54.7 ± 5.7               | 52 ± 5                                        | 53 ± 6         | --                       |
| Hypoglycemia rate before the clamp studies* | 0.17 ± 0.38 <sup>§</sup> | 0.0 ± 0.0                                     | 0.0 ± 0.0      | --                       |

\*during the three days prior to the clamp studies (or three days before randomization<sup>§</sup>).

## SUPPLEMENTARY DATA

Supplementary Table 2. Basal insulin titration algorithm based on relationship between bedtime PG and next morning FPG

| <b>Δ PG (Bedtime PG- FPG)<br/>mg/dl</b> | <b>Insulin Dose Change<br/>(U)</b> |
|-----------------------------------------|------------------------------------|
| <b>&gt; +30</b>                         | <b>+2</b>                          |
| <b>Between +21 and +30</b>              | <b>+2</b>                          |
| <b>Between +11 and +20</b>              | <b>+1</b>                          |
| <b>Between +10 and -10</b>              | <b>0</b>                           |
| <b>Between -11 and -20</b>              | <b>-1</b>                          |
| <b>&lt;-21</b>                          | <b>-2</b>                          |

\*titration occurred only on days with 2-h post-dinner PG 100-130 mg/dl

The relationship between bedtime PG and next morning fasting PG (FPG) was considered. With a notable decline in FPG from bedtime values, basal insulin dose was reduced, the opposite was done if FPG was higher than bedtime PG. Since the carry-over effect of post-dinner hypoglycemia or hyperglycemia, may easily impact FPG thus preventing the interpretation of FPG as the specific effect of basal insulin, the dose change of basal insulin occurred only on days with optimal post-dinner PG (100-130 mg/dl). Days with either post dinner hypoglycemia or hyperglycemia were excluded from the insulin dose calculation

## SUPPLEMENTARY DATA

Supplementary Figure 1. Study design

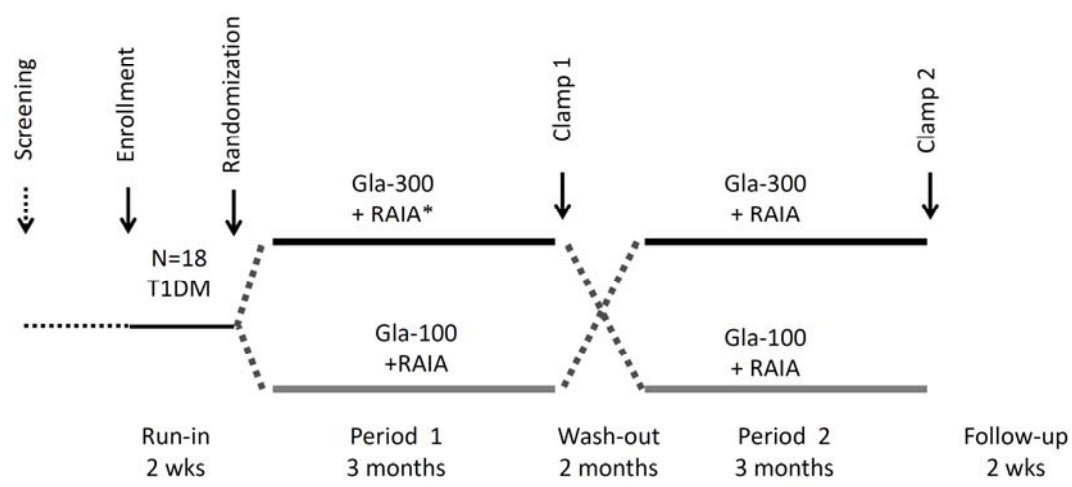

\* RAIA: rapid-acting insulin analog

Supplementary Figure 2. Clamp study design

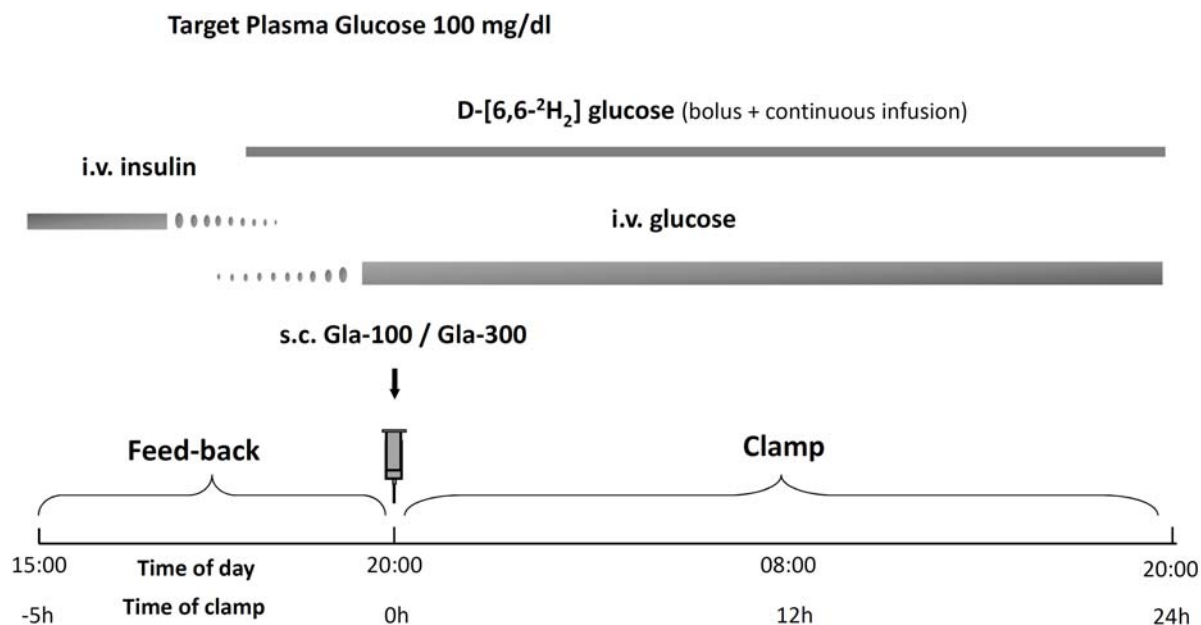

SUPPLEMENTARY DATA

Supplementary Figure 3. PK and PD variables and EGP calculated for intervals of 6h of the 24h of the study, and expressed as percentage of the 0-24 h value. A, FIRI-AUC; B, GIR-AUC; C, EGP-AUC.

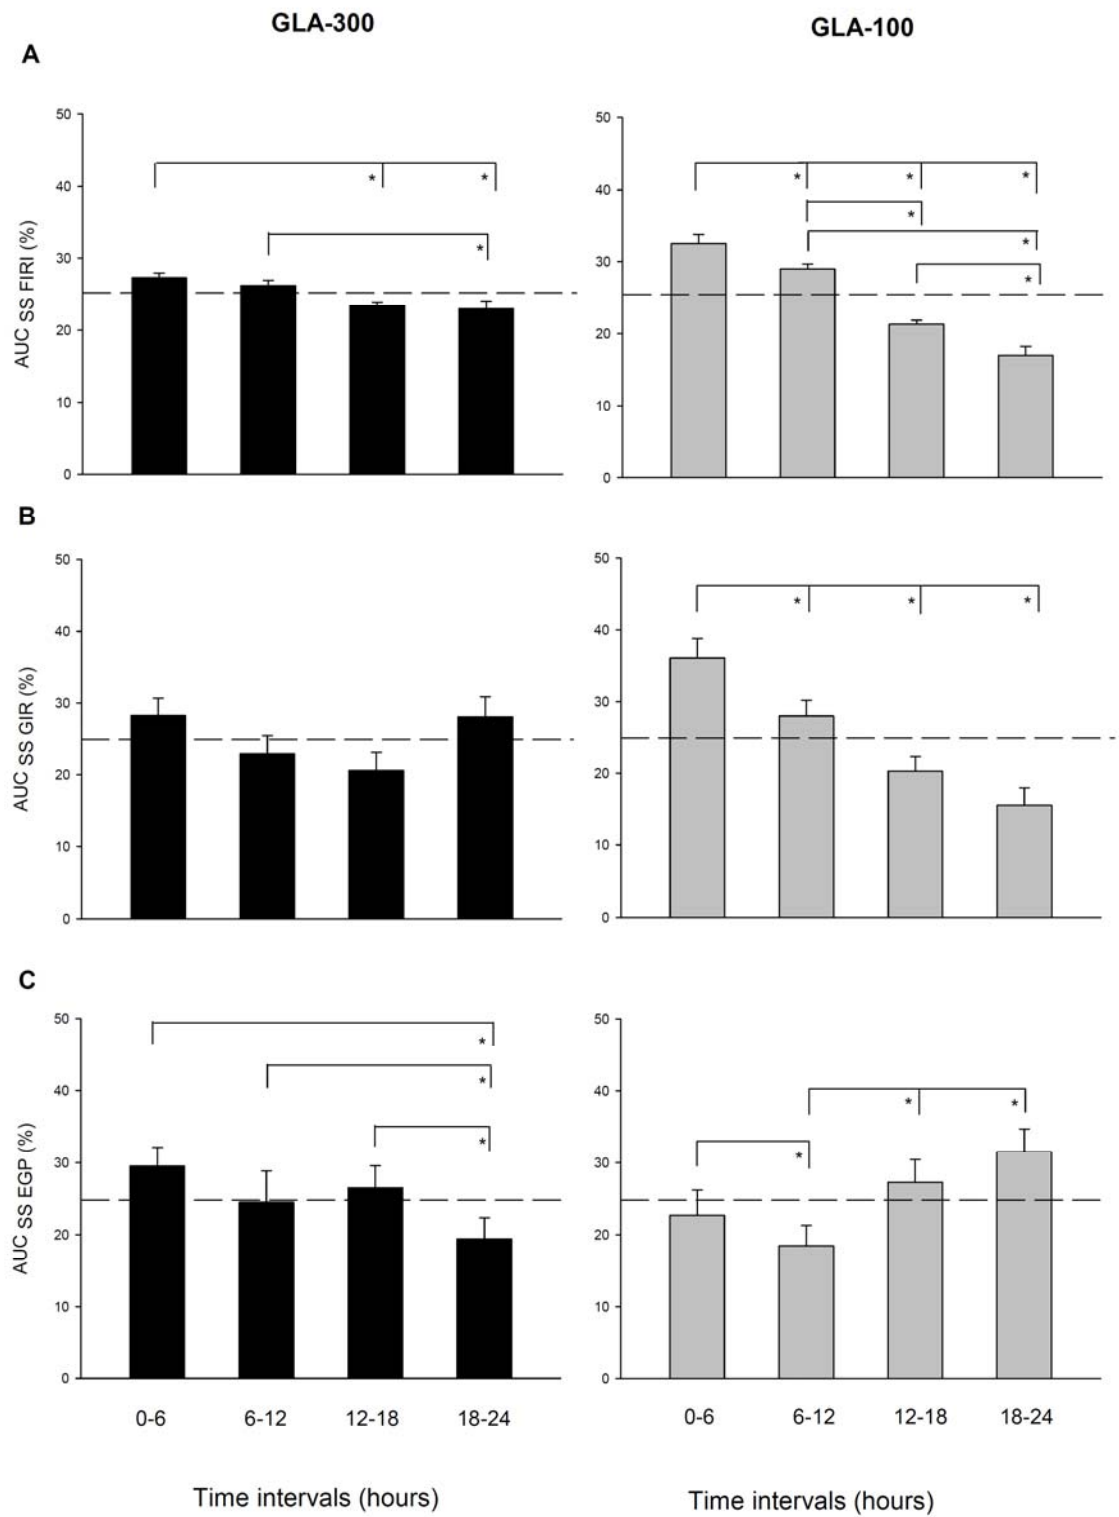

SUPPLEMENTARY DATA

Supplementary Figure 4. TTR (tracer to tracee ratio) in the 24 h clamp study.

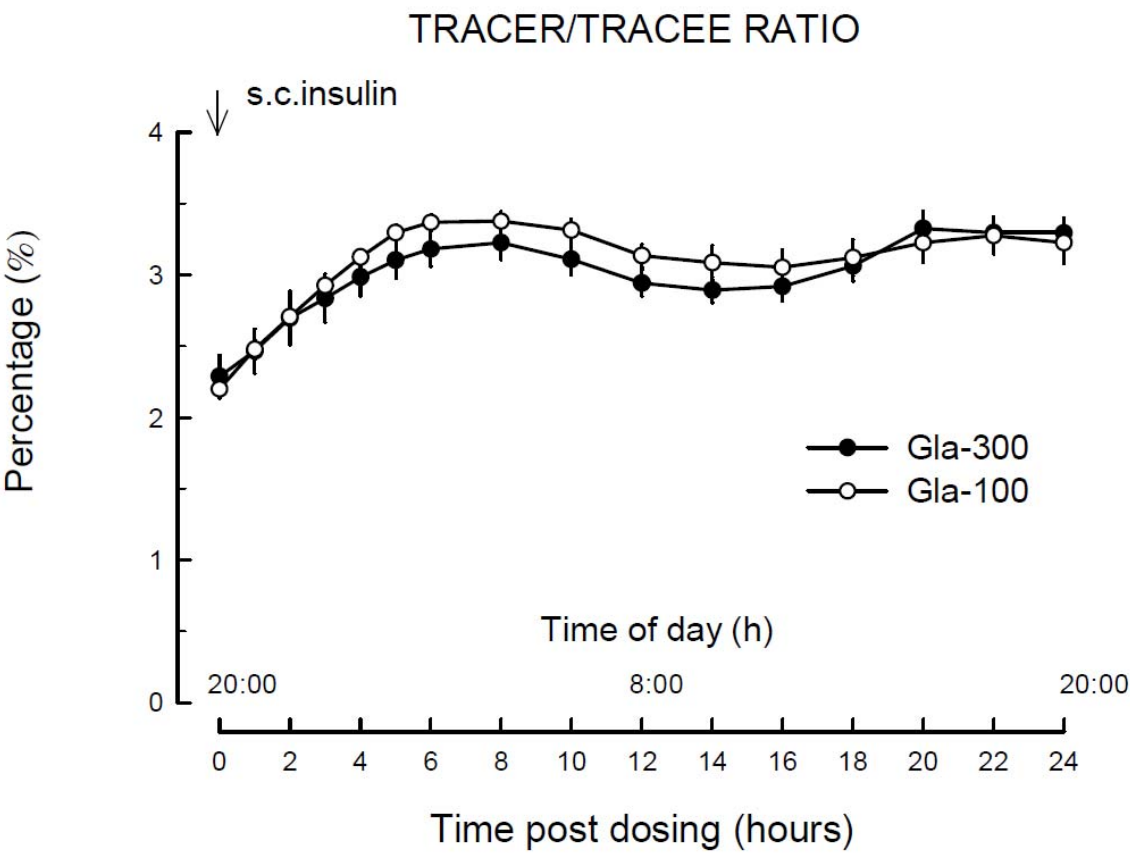

Supplement: dc180706supplementarydata.pdf [file dc180706supplementarydata.pdf]
